# Supplementary material for: Versatile catalysts constructed from hybrid polyoxomolybdates for simultaneously detoxifying sulfur mustard and organophosphate simulants
Source: Royal Society of Chemistry journal article supplement (doi:10.1039/c9cy00094a), 2019-01-01
Supplement: c9cy00094a1.pdf [file c9cy00094a1.pdf]

## Supporting Information

### **Versatile catalysts constructed from hybrid polyoxomolybdates for simultaneously detoxifying sulfur mustard and organophosphate simulants**

Yujiao Hou, Haiyan An,\* Shenzhen Chang, Jie Zhang

*College of Chemistry, Dalian University of Technology, Dalian 116023, P. R. China*

#### **CONTENTS:**

**I. Supplementary experiments**

**II. Supplementary structure figures**

**III. Supplementary physical characterizations**

**IV. Supplementary tables**

---

\*Corresponding author. Tel: +86-411-84657675. E-mail address: anhy@dlut.edu.cn

## I. Supplementary experiments

### Materials and methods

We used chemicals that were commercially purchased without further purification. Elemental analyses (H and N) were performed on a Perkin-Elmer 2400 CHN elemental analyzer; As, Te, Mo, Co, Ni, Mn, Zn, K, Na, Rb, and Cs were analyzed on a PLASMA-SPEC (I) ICP atomic emission spectrometer. **CAUTION:** The raw materials of the synthesis ( $\text{As}_2\text{O}_3$  and  $\text{Na}_2\text{TeO}_3$ ) are toxic and must be handled by trained personnel using applicable safety procedures in a closed system or in a hood under good ventilation. We detected the IR spectra using KBr pellets as the background in the range  $400\text{--}4000\text{ cm}^{-1}$  on an Alpha Centaur FT/IR spectrophotometer. TG analyses were performed in flowing  $\text{N}_2$  at a heating rate of  $10^\circ\text{C min}^{-1}$  on a Perkin-Elmer TGA7 instrument. The PXRD patterns of the samples were recorded on a Rigaku Dmax 2000 X-ray diffractometer with graphite monochromatized Cu-K $\alpha$  radiation ( $\lambda = 0.154\text{ nm}$ ) and  $2\theta$  varying from  $5^\circ$  to  $50^\circ$ . The diffuse reflectivity spectra were performed on finely ground samples with a Cary 500 spectrophotometer equipped with a 110 mm diameter integrating sphere, which were measured from 200 to 800 nm. The GC analysis was performed with an Agilent HP6890 spectrometer with a flame ionization detector, which was used to monitor the conversion and selectivity. GC-MS at the final time point was used to confirm the identity of the products. The GC-MS spectra were measured on an Agilent HP6890/5973MSD spectrometer.  $^1\text{H}$ NMR spectroscopy was also used to monitor conversion and ascertain the product. And  $^1\text{H}$ NMR spectra were collected on a 500 MHz Bruker Avance III system in  $\text{CDCl}_3$ .

### **Synthesis of $K_3[AsMo_6O_{21}(PABA)_3] \cdot nH_2O$ (13)**

The compound was synthesized according to the literature:  $Na_2MoO_4$  (0.145 g, 0.6 mmol),  $As_2O_3$  (0.197 g, 0.1 mmol), and PABA (0.0411g, 0.3mmol) were dissolved in 20 mL of water. The pH value of the mixture was adjusted to 3.5 with HCl solution under stirring. The solution was stirring for one hour at room temperature. Then, the solution was heated and stirred for one hour at 80 °C. The filtrate was kept undisturbed for two weeks under ambient conditions. and then colorless crystals were isolated. FTIR data ( $cm^{-1}$ ): 3442 (s), 3070 (m), 1564 (s), 1434 (s), 1441 (w), 1316 (w), 1111(m), 921(w), 889(s) 772 (w), 690 (m), 534 (m).

### **Synthesis of $K_6Na_2H_2[(H_2O)_6Co][AsMo_6O_{21}(Ala)_3]_4 \cdot 41H_2O$ (14)**

The synthetic procedure was similar to that used for **1**, with the organic ligand Ala (0.0267 g, 0.3 mmol) alone instead of PABA (0.0411g, 0.3mmol). The filtrate was kept undisturbed for two weeks under ambient conditions, and then pink crystals were isolated in about 32% yield (based on Mo). Calcd for **14**: Mo, 37.16 As, 4.84; Co, 0.95; Na, 0.74; K, 3.79; C, 6.98; N, 2.71; H, 2.83 (%). Found: Mo, 37.55; As, 5.11; Co, 1.05; Na, 0.80; K, 3.39; C, 7.21; N, 2.55; H, 2.76 (%). FTIR data ( $cm^{-1}$ ): 3432 (s), 3139 (m), 1586 (s), 1435 (s), 1328 (w), 1294 (w), 1107(w), 914(m), 888(s), 772 (w), 668 (m), 505(w), 443 (m).

### **Synthesis of $K_{10}[(H_2O)_6Co][AsMo_6O_{21}(PHBA)_3]_2 \cdot 23H_2O$ (15)**

The synthetic procedur was similar to that used for **1**, with the organic ligand PHBA (0.0411 g, 0.3 mmol) alone instead of PABA (0.0411g, 0.3mmol). The filtrate was kept undisturbed for two weeks under ambient conditions, and then pink crystals were

isolated in about 45% yield (based on Mo). Calcd for **15**: Mo, 30.56; As, 3.98; Co, 1.56; K, 10.38; C, 13.39; H, 2.35 (%). Found: Mo, 30.85; As, 4.11; Co, 1.45; K, 9.99; C, 13.21; H, 2.56 (%). FTIR data ( $\text{cm}^{-1}$ ): 3377 (s), 3173 (m), 1598 (s), 1439 (s), 1410 (s), 1242 (m), 1170(m), 1104(w), 892(m), 786 (w), 675 (m), 503(w), 441 (w).

### **Catalytic oxidation of CEES**

The evaluation of 2-chloroethyl ethyl sulfide (CEES) oxidation was performed as follows. Catalyst (2.5  $\mu\text{mol}$ ) was added acetonitrile (0.5 mL), followed by addition of CEES (0.25 mmol) and naphthalene (internal standard, 0.25mmol). After stirring the mixture at room temperature,  $\text{H}_2\text{O}_2$  (0.28 mmol) was added dropwise. The reaction was monitored by gas chromatography at various time intervals. The catalytic reaction was carried out at room temperature for 12 minutes.

### **Catalytic hydrolysis of DECP**

The hydrolysis reactions of diethyl cyanophosphonate (DECP) were performed as follows. Catalyst (0.6  $\mu\text{mol}$ ) was added to the mixture of  $\text{H}_2\text{O}$  (50  $\mu\text{L}$ ) and DMF (600  $\mu\text{L}$ ), followed by addition of DECP (1 mmol) and naphthalene (internal standard, 0.25mmol). The catalytic reaction was carried out at room temperature for 10 minutes. The reaction was monitored by gas chromatography at various time intervals. After the catalytic reactions was finished, the reusability of the hydrolysis reactions was continuously tested by adding the same amount of DECP (1 mmol) to the above reaction vessel under the similar situations.

### **Catalytic hydrolysis of DECP in the presence of $\text{H}_2\text{O}_2$**

Catalyst (0.6  $\mu\text{mol}$ ) was added to the mixture of  $\text{H}_2\text{O}$  (50  $\mu\text{L}$ ) and DMF (600  $\mu\text{L}$ ),

followed by addition of DECP (1 mmol) H<sub>2</sub>O<sub>2</sub> (0.5 mmol) and naphthalene (internal standard, 0.25mmol). The catalytic reaction was carried out at room temperature for 10 minutes. The reaction was monitored by gas chromatography at various time intervals.

#### **Degradation of CEES and DECP at the same time**

The oxidation of CEES and hydrolysis of DECP were performed in the same reaction vessel. Catalyst (2.5 μmol) was added DMF (600 μL) and H<sub>2</sub>O (50 μL), followed by addition of CEES (0.25 mmol), DECP (1 mmol), H<sub>2</sub>O<sub>2</sub> (0.28 mmol), and naphthalene (internal standard, 0.25mmol). The catalytic reaction was carried out at room temperature for 12 minutes. The reaction was monitored by gas chromatography at various time intervals.

**Warning:** HCN (one product of hydrolysis of DECP) is dangerous. The experiment must be done in a closed system or in a hood under good ventilation and using the safeguard procedures.

#### **X-ray crystallography.**

A Bruker Smart CCD diffractometer with Mo K $\alpha$  radiation ( $\lambda = 0.71073 \text{ \AA}$ ) was used to collect the crystallographic data of four compounds at 293 K or 220 K by  $\theta$  and  $\omega$  scan modes. The method of empirical absorption correction was adopted. SHELXTL-97 software was used to solve the structures of **1–12** and refine the data.<sup>1</sup> In **1–12**, most non-H atoms are refined anisotropically, and only some of water molecules were excepted. H atoms linked to the C and N atoms were were fixed in their ideal positions. To get reasonable thermal parameters and atom sites, some commands such as “isor”

and “dfix” were utilized. Table S4 S5 summarizes the structural determination and crystallographic data for **1-12**.

The CCDC reference numbers for compounds **1-12** are 1871471–1871482, respectively.

## II. Supplementary structure figures

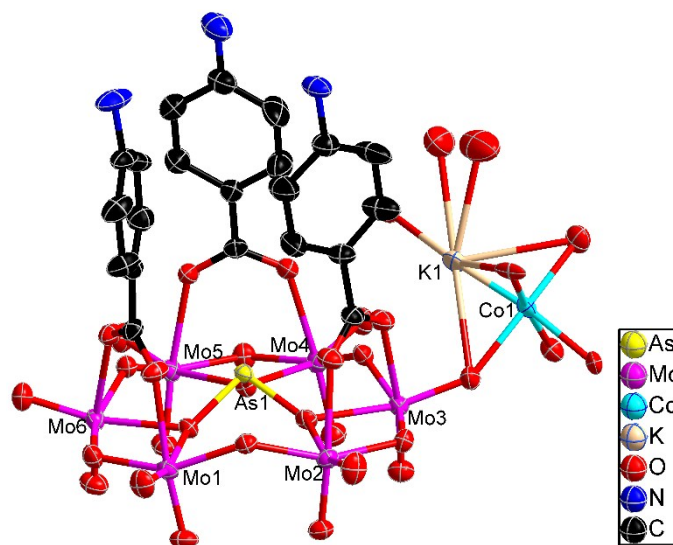

**Fig. S1** ORTEP drawing of **1** with thermal ellipsoids at 50% probability. Free water molecules are omitted for clarity. (color code: Co light blue, Mo purple, As yellow, K Tan, O red, N blue, C black).

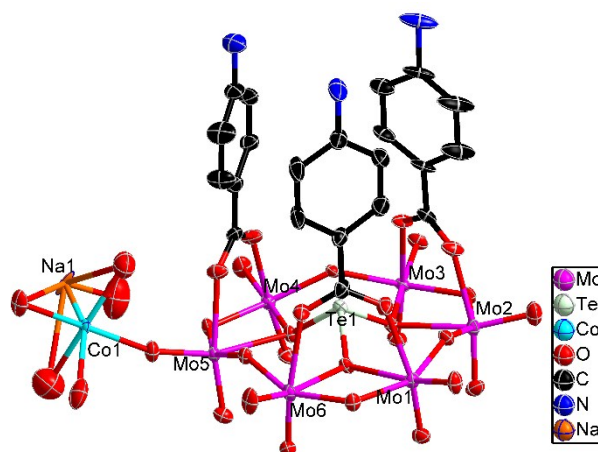

**Fig. S2** ORTEP drawing of **5** with thermal ellipsoids at 50% probability. Free water molecules are omitted for clarity. (color code: Co light blue, Na, orange, Mo purple, Te light green, O red, N blue, C black).

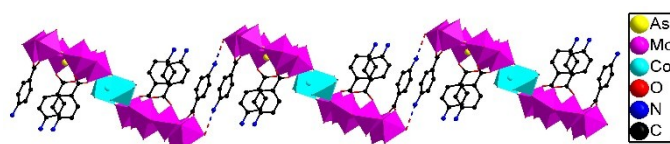

**Fig. S3** View of the 1D supramolecular chain for **1**.

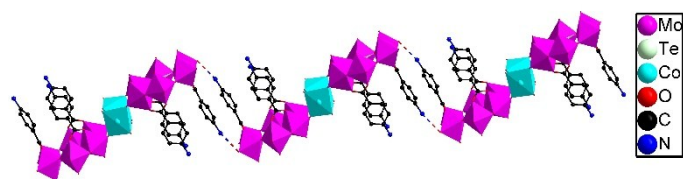

**Fig. S4** View of the 1D supramolecular chain for **5**.

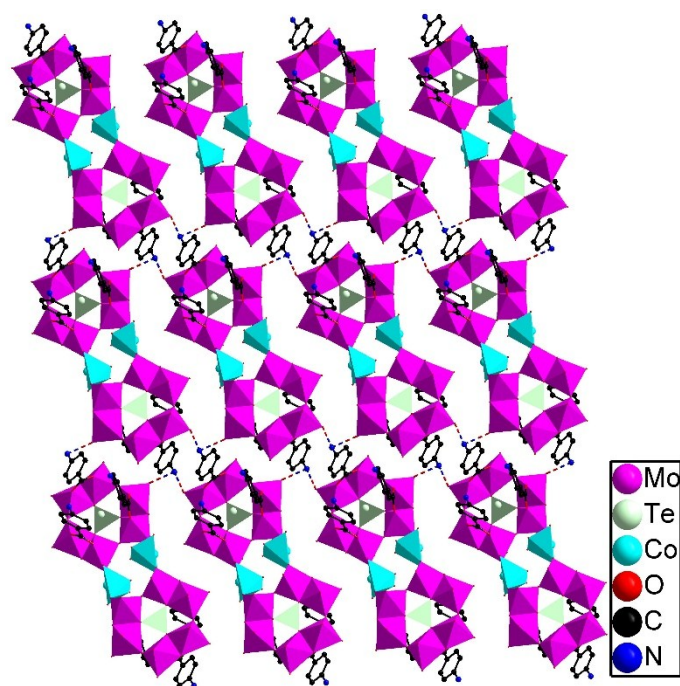

**Fig. S5** View of the 2D supramolecular framework showing the hydrogen bonds in **5**.

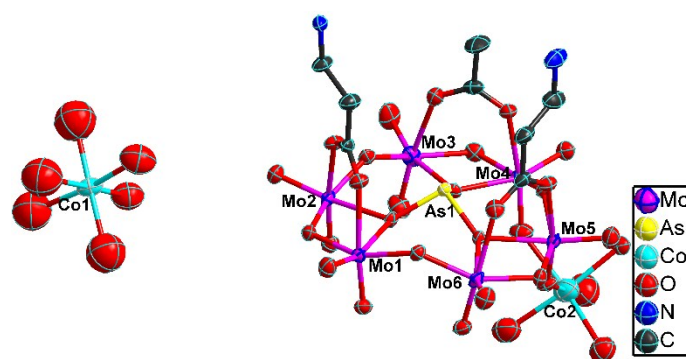

**Fig. S6** ORTEP drawing of **9** with thermal ellipsoids at 50% probability. Free water molecules are omitted for clarity. (color code: Co light blue, Mo purple, As yellow, O red, N blue, C black).



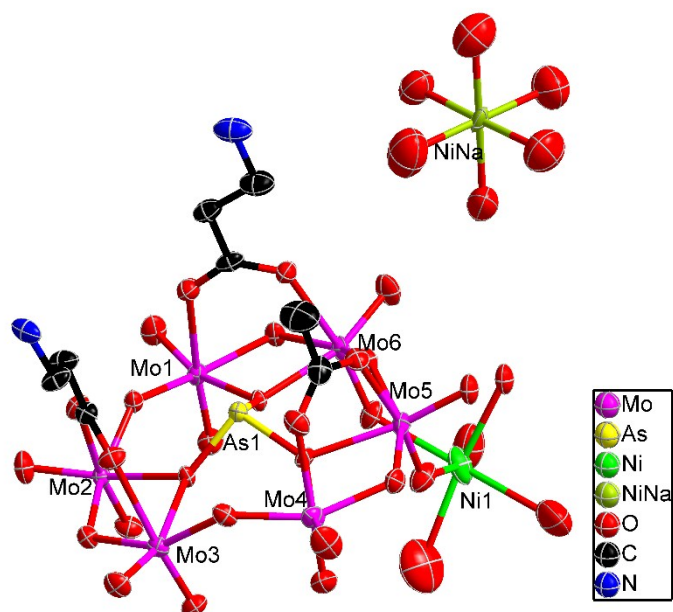

**Fig. S7** ORTEP drawing of **10** with thermal ellipsoids at 50% probability. Free water molecules are omitted for clarity. (color code: Ni Bright green, NiNa Lime, Mo purple, As yellow, O red, blue, C black).

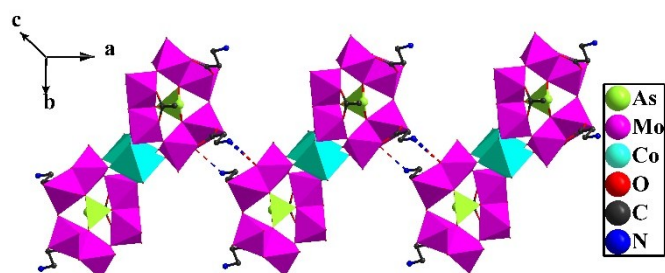

**Fig. S8** View of the 1D supramolecular chain in **9**.

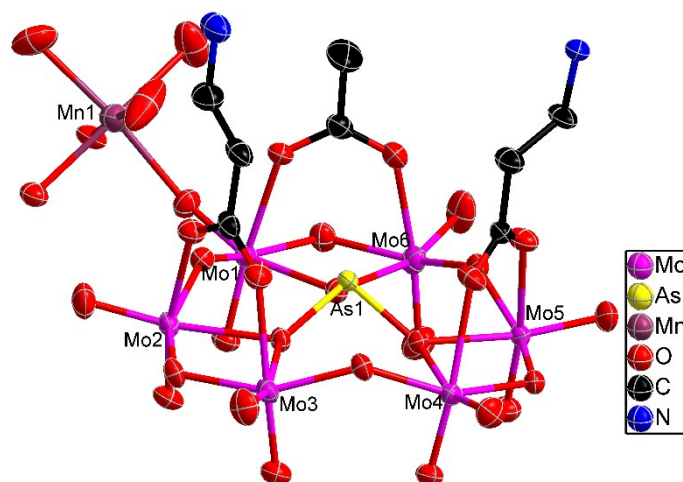

**Fig. S9** ORTEP drawing of **12** with thermal ellipsoids at 50% probability. Free water molecules are omitted for clarity. (color code: Mo purple, Mn plum, As yellow, O red, N blue, C black).

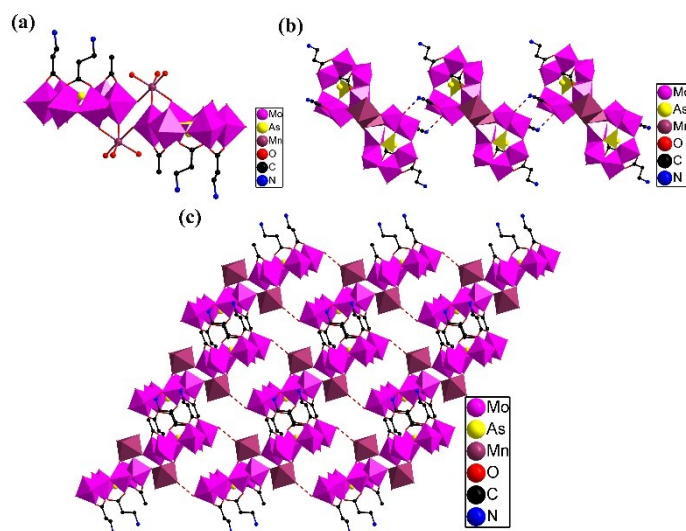

**Fig. S10** a) Ball-stick and polyhedral representation of dimeric polyanion for **12**; b) View of the 1D supramolecular chain; c) View of the 2D supramolecular framework showing the hydrogen bonds.

### III. Supplementary physical characterizations

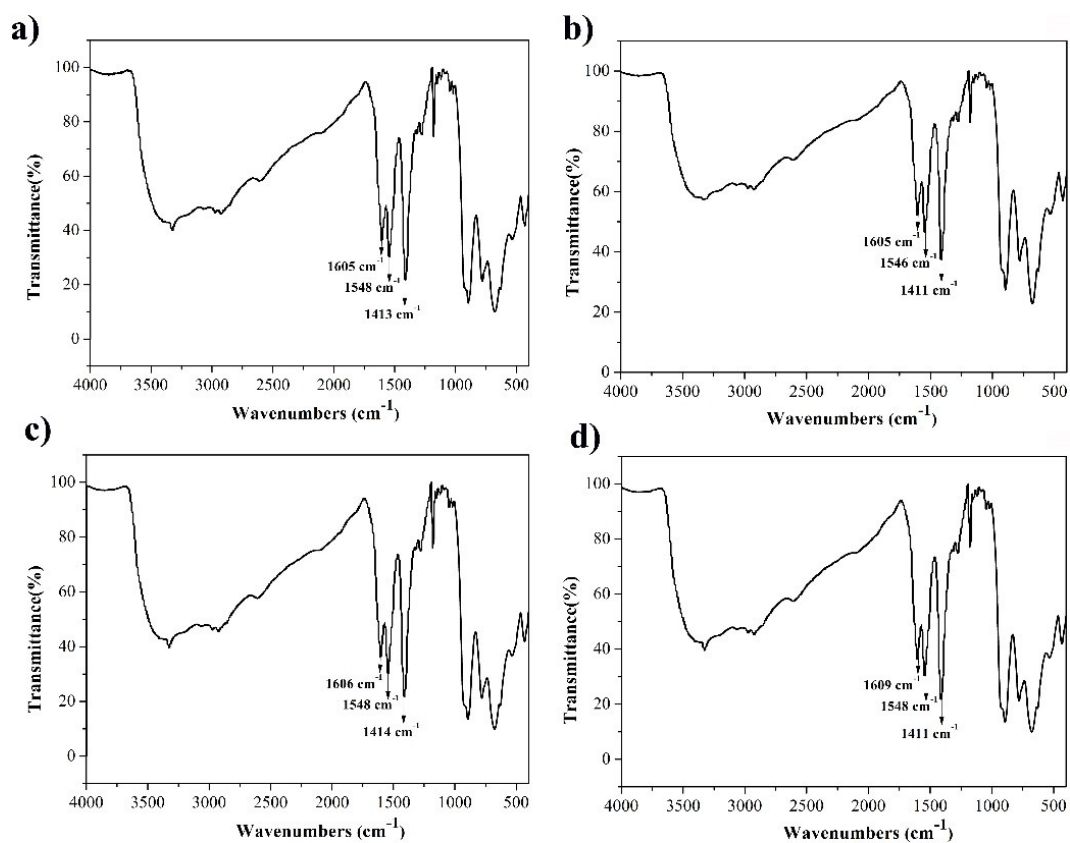

**Fig. S11** a b c d) IR spectra for compounds 1–4. The peaks from 400 to 1000  $\text{cm}^{-1}$  are similar for the four compounds, which ascribe to the same skeletal vibrations of  $\{\text{AsMo}_6\text{O}_{21}\}$  anions. The characteristic vibrational bands of the organic ligands are located in the region between 1100 and 1650  $\text{cm}^{-1}$ . While the absorption maxima at 1607, 1548, and 1413  $\text{cm}^{-1}$  for **1** are indicative of the  $\nu_{\text{as}}(\text{COO})$  and  $\nu_{\text{s}}(\text{COO})$  stretching frequencies, which demonstrates the bidentate coordination mode of the carboxylate group in **1–4**.

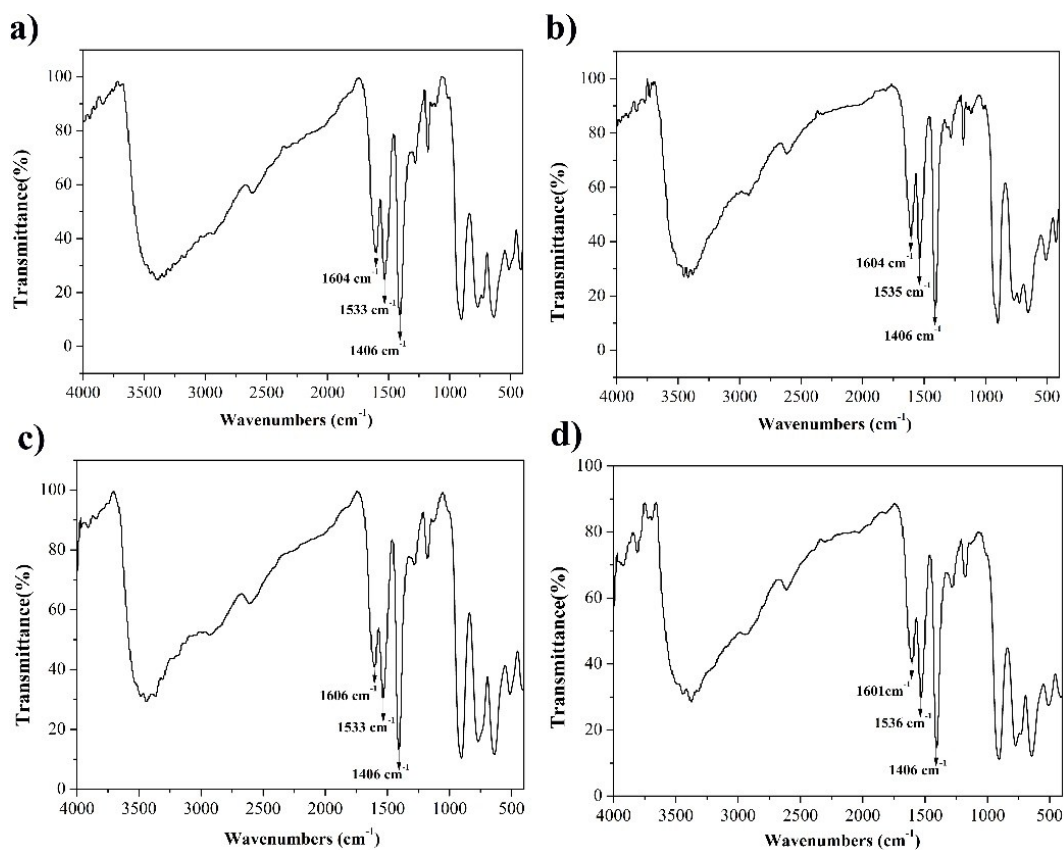

**Fig. S12** a b c d) IR spectra for compounds **5–8**. The peaks from 400 to 1000  $\text{cm}^{-1}$  are similar for the four compounds, which ascribe to the same skeletal vibrations of  $\{\text{TeMo}_6\text{O}_{21}\}$  anions. The characteristic vibrational bands of the organic ligands are located in the region between 1100 and 1650  $\text{cm}^{-1}$ . While the absorption maxima at 1604, 1533, and 1406  $\text{cm}^{-1}$  for **5** are indicative of the  $\nu_{\text{as}}(\text{COO})$  and  $\nu_{\text{s}}(\text{COO})$  stretching frequencies, which demonstrates the bidentate coordination mode of the carboxylate group in **5–8**.

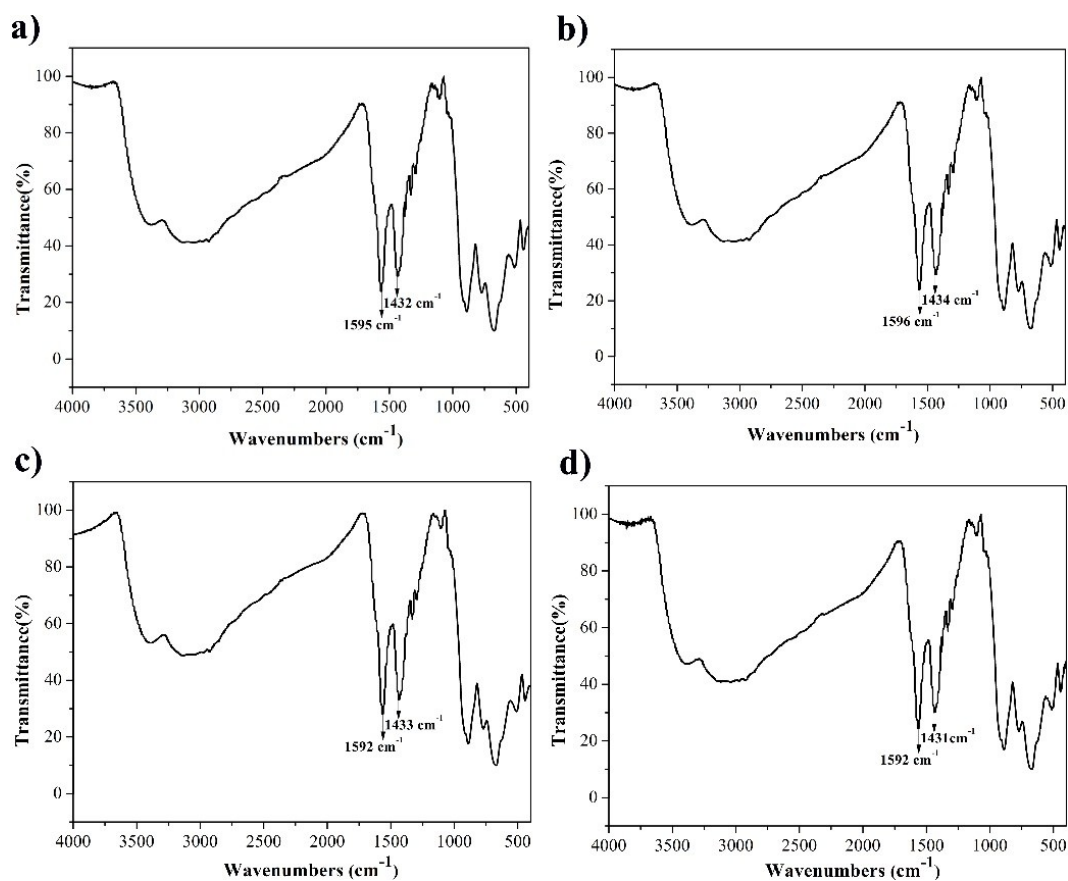

**Fig. S13** a b c d) IR spectra for compounds **9–12**. The peaks from 400 to 1000  $\text{cm}^{-1}$  are similar for the four compounds, which ascribe to the same skeletal vibrations of  $\{\text{AsMo}_6\text{O}_{21}\}$  anions. The characteristic vibrational bands of the organic ligands are located in the region between 1100 and 1650  $\text{cm}^{-1}$ . While the absorption maxima at 1595, and 1432  $\text{cm}^{-1}$  for **9** are indicative of the  $\nu_{\text{as}}(\text{COO})$  and  $\nu_{\text{s}}(\text{COO})$  stretching frequencies, which demonstrates the bidentate coordination mode of the carboxylate group in **9–12**.

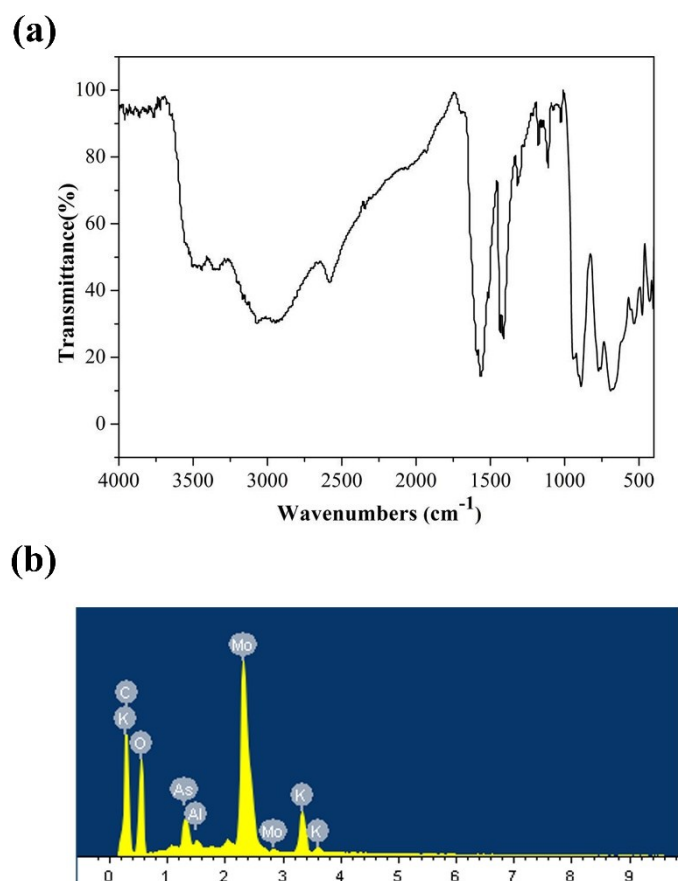

**Fig. S14** a) IR spectrum for compound **13**; b) EDS for compound **13**.

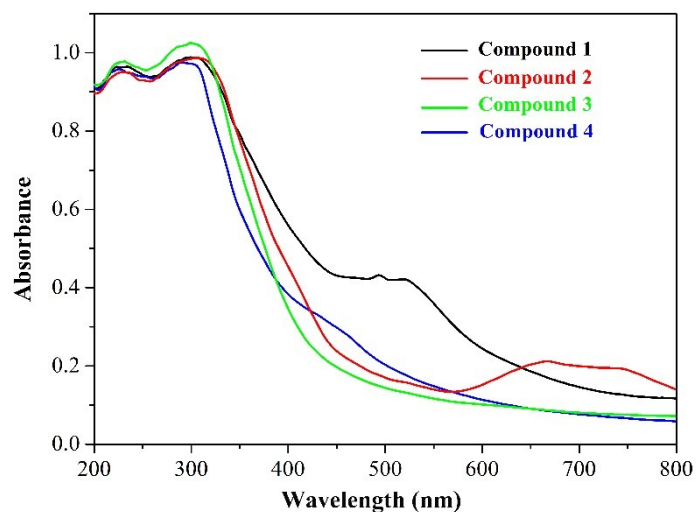

**Fig. S15** UV-vis diffuse reflectance spectra of compounds **1-4**. The diffuse reflectance spectra of twelve solid samples were detected to obtain the absorption bands located in both the ultraviolet and visible regions. Two intense absorption peaks located in 230 and 300 nm for **1**, 229 and 301 nm for **2**, 228 and 303 nm for **3**, and 225 and 296 nm

for **4** in the UV region, which are assigned to O  $\rightarrow$  Mo charge transfer for  $\{\text{AsMo}_6\text{O}_{21}\}$  polyoxoanions. In the visible region (400–800 nm), the plots display absorption bands at 493 nm and 525 nm for **1**, 668 nm and 745 nm for **2**, 450 nm for **4**, which were respectively assigned to the  ${}^4\text{T}_{1g} \rightarrow {}^4\text{T}_{2g}$  and  ${}^4\text{A}_{2g} \rightarrow {}^4\text{T}_{1g}$  for low-spin  $\text{Co}^{2+}$ ,  ${}^3\text{A}_{1g} \rightarrow {}^3\text{T}_{2g}$  and  ${}^3\text{A}_{2g} \rightarrow {}^3\text{T}_{1g}$  for  $\text{Ni}^{2+}$ , and  ${}^4\text{T}_{1g} \rightarrow {}^6\text{A}_{1g}$  for  $\text{Mn}^{2+}$ .

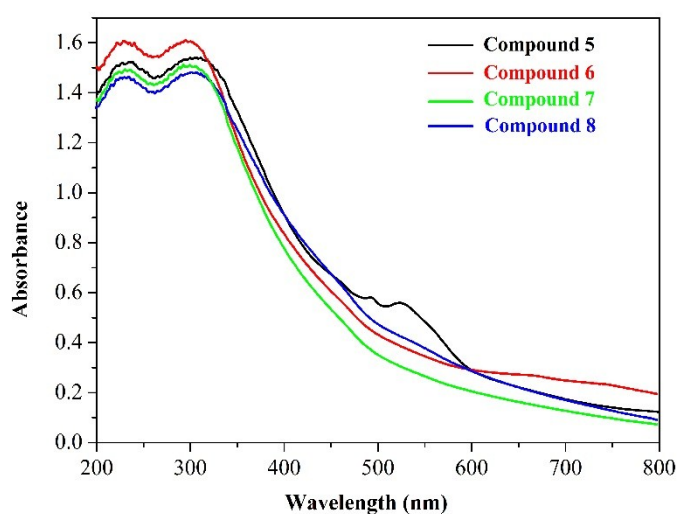

**Fig. S16** UV-vis diffuse reflectance spectra of compounds **5–8**.

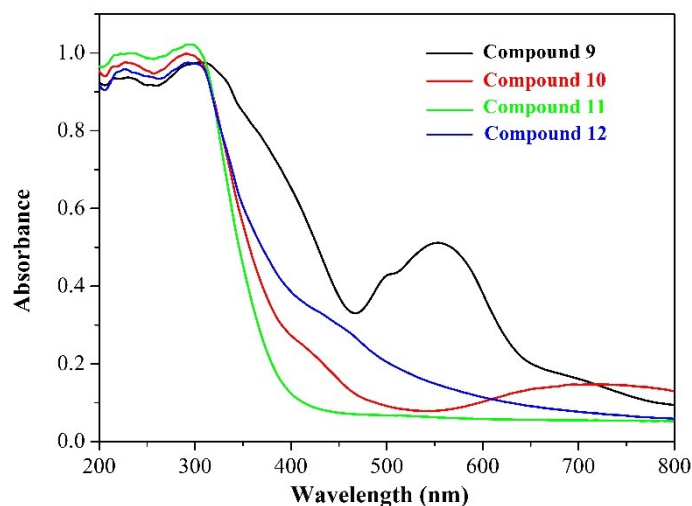

**Fig. S17** UV-vis diffuse reflectance spectra of compounds **9–12**.

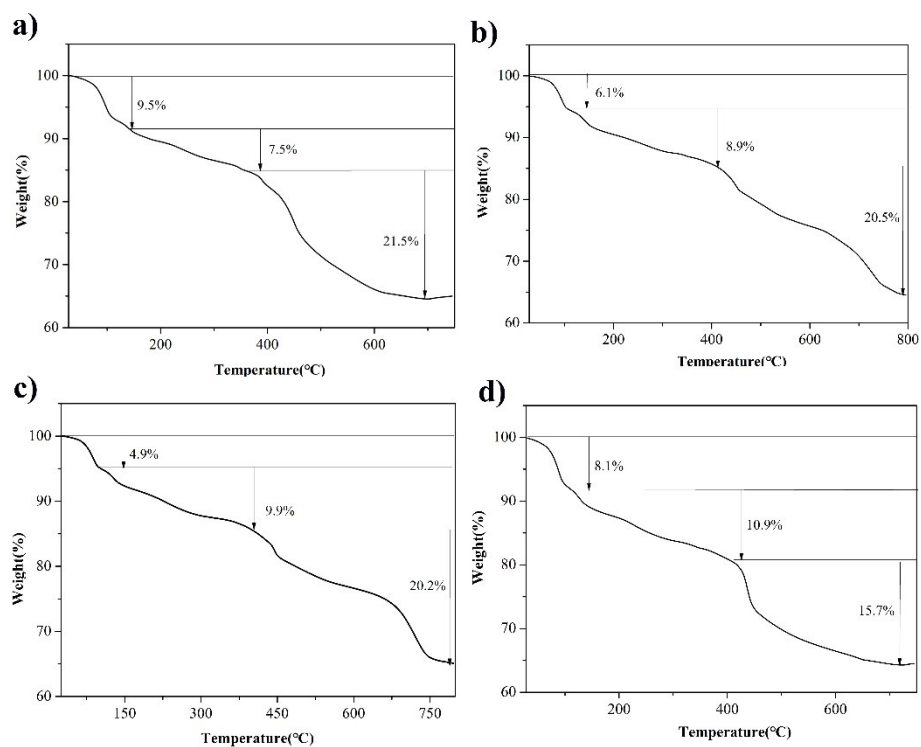

**Fig. S18 a b c d)** Thermogravimetric plots of compounds **1-4**.

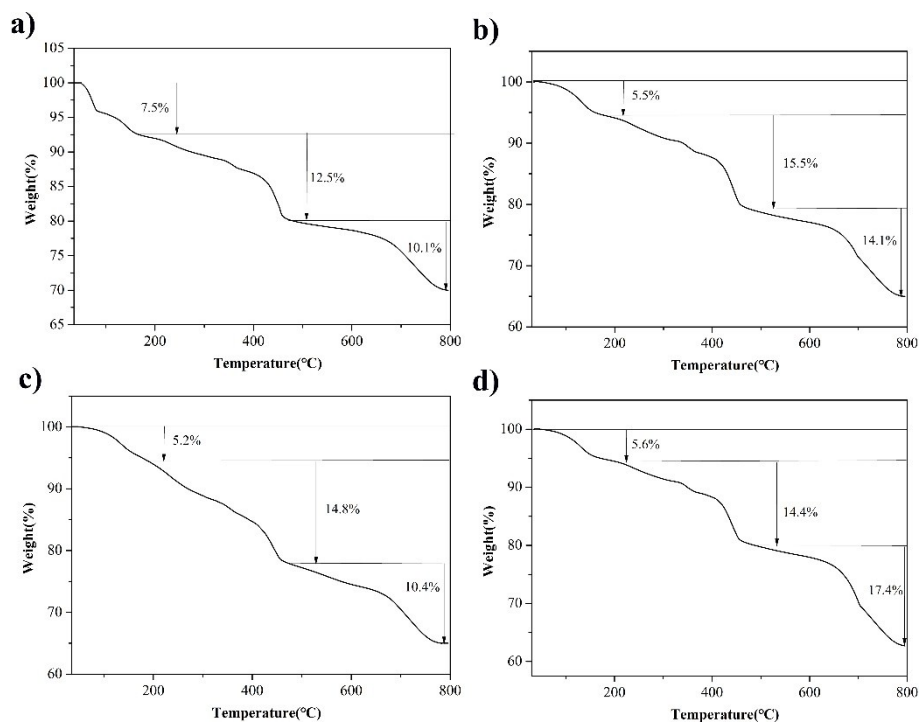

**Fig. S19 a b c d)** Thermogravimetric plots of compounds **5-8**.



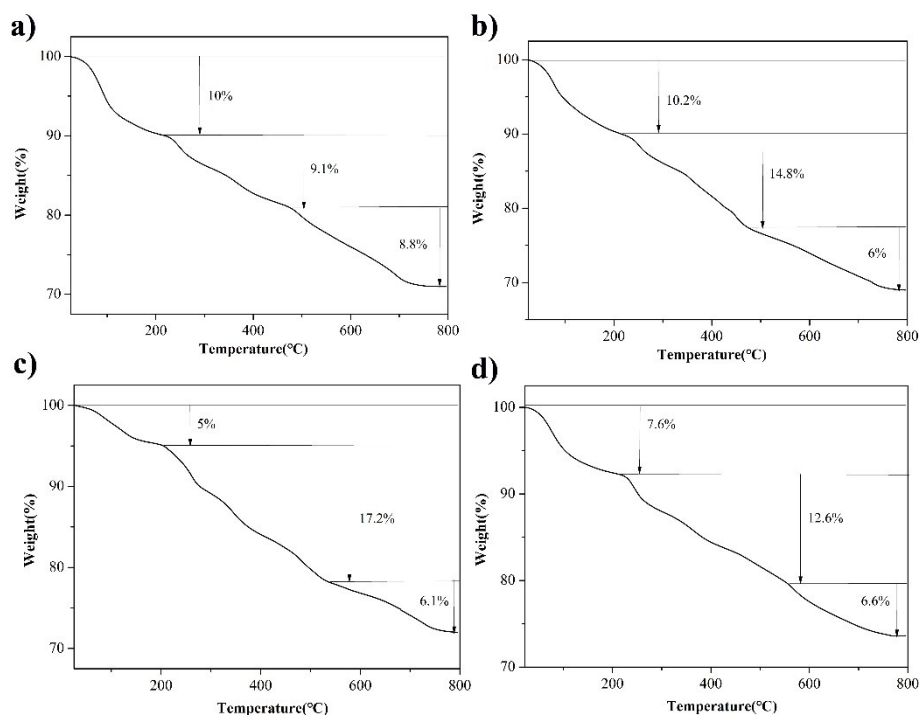

**Fig. S20 a b c d) Thermogravimetric plots of compounds 9–12.**

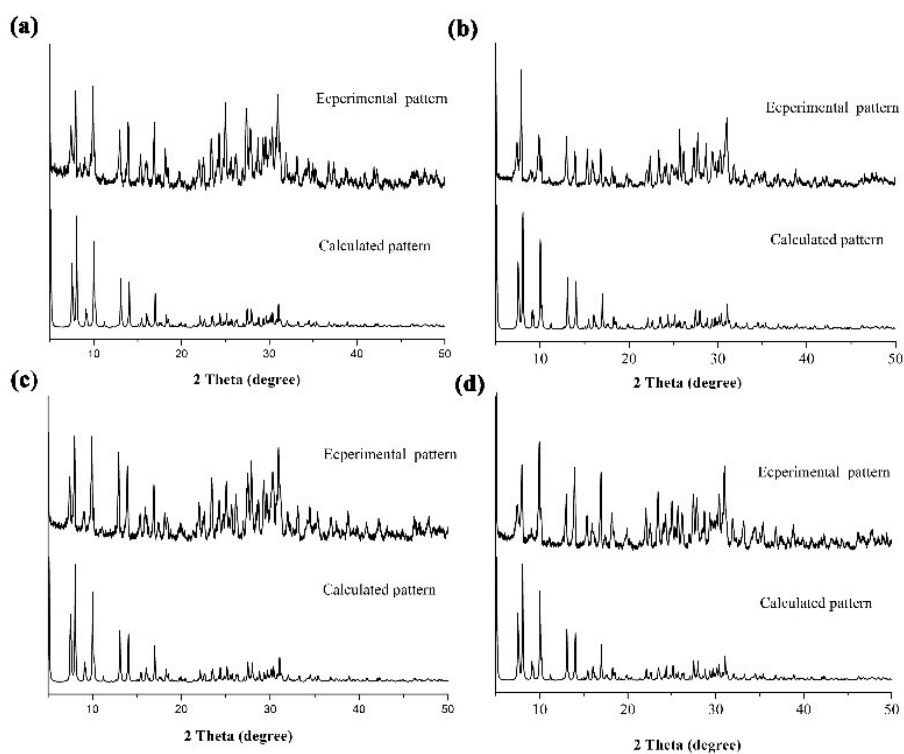

**Fig. S21 a b c d) The calculated and experimental PXRD patterns for compounds 1–4.**

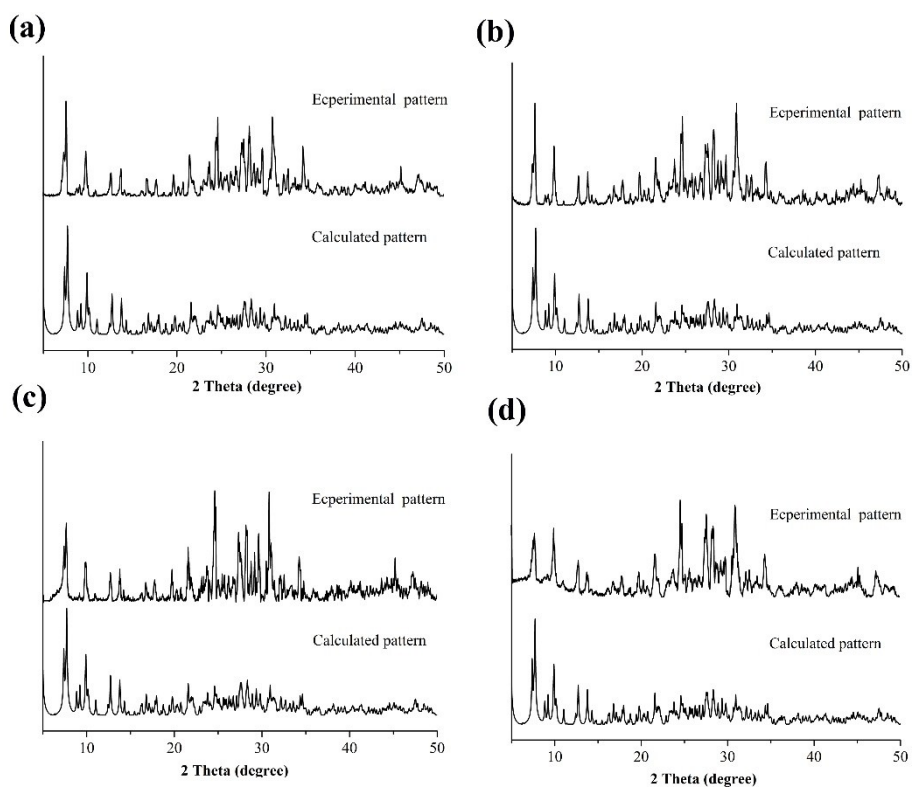

**Fig. S22 a b c d)** The calculated and experimental PXRD patterns for compounds 5-8.

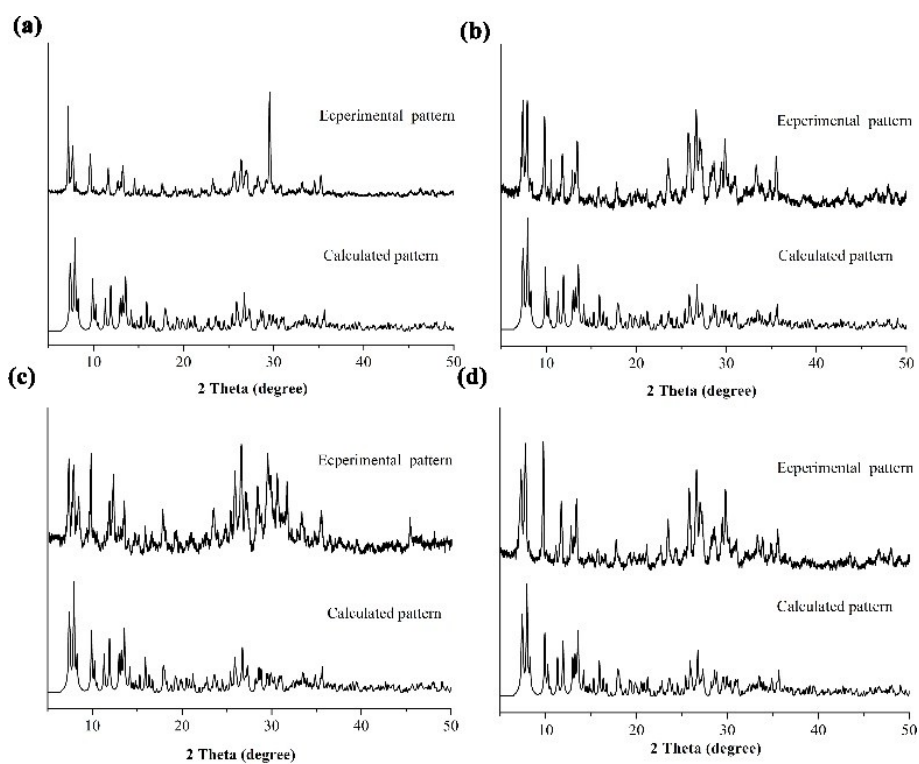

**Fig. S23 a b c d)** The calculated and experimental PXRD patterns for compounds 9-12.

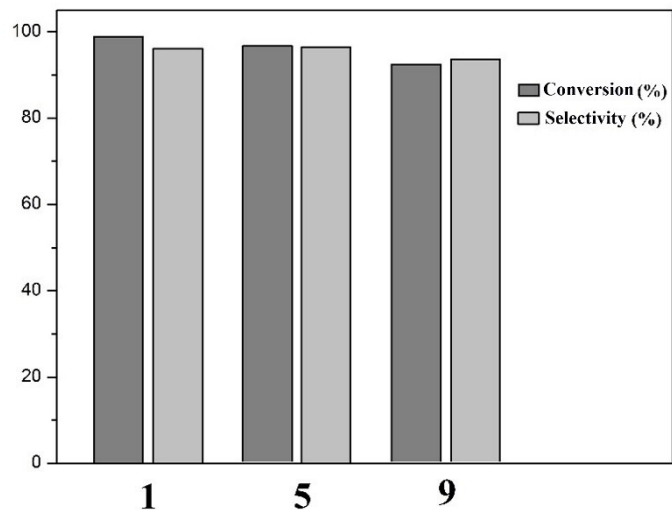

**Fig. S24** The comparison of conversion and selectivity of CEES oxidation for compounds **1**, **5** and **9** under similar conditions.

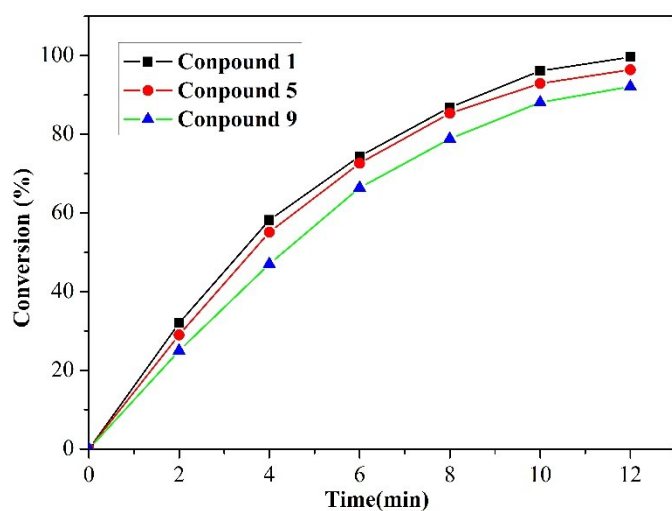

**Fig. S25** Time profile for the oxidative decontamination of CEES using **1**, **5**, and **9** with the similar conditions.

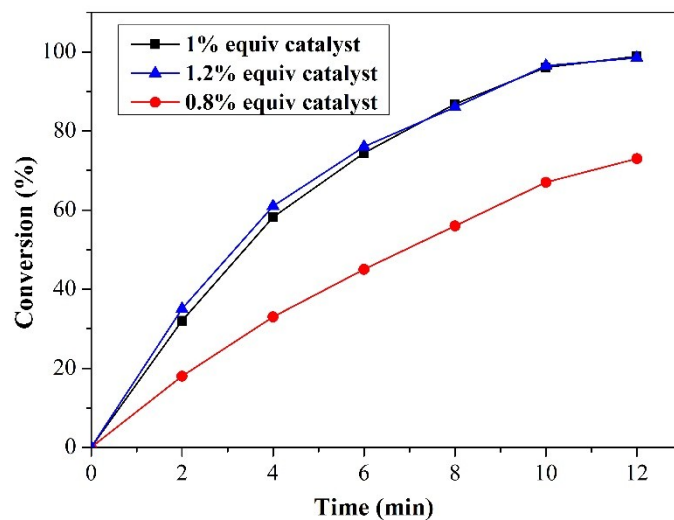

**Fig. S26** Time profile for the oxidative decontamination of CEES using **1** with 1 %, 1.2% and 0.8 % equiv. catalyst.

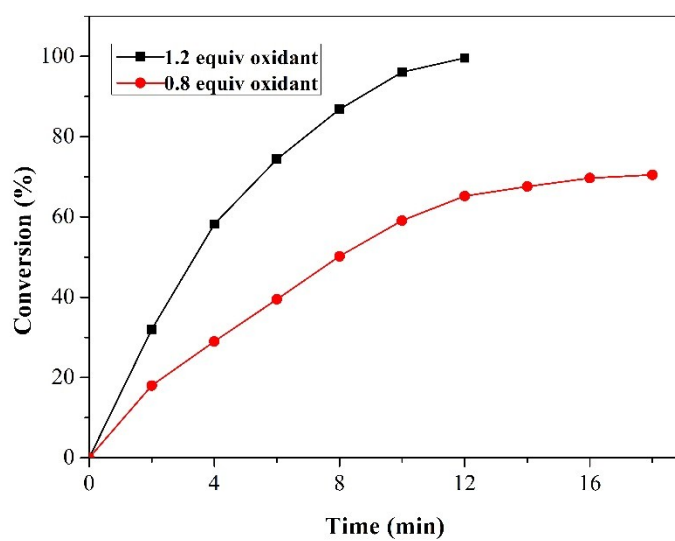

**Fig. S27** Time profile for the oxidative decontamination of CEES using **1** with 1.2 and 0.8 equiv. oxidant.

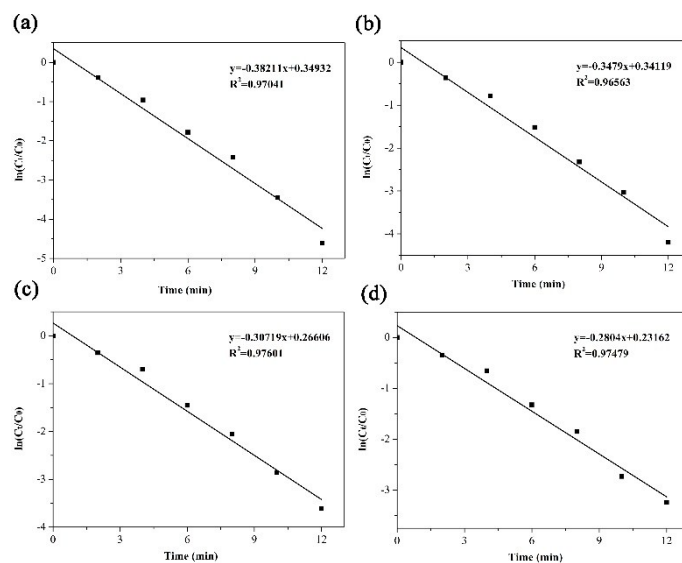

**Fig. S28** a b c d) Kinetic analysis of CEES oxidation for compounds 1-4 ( $\ln(C_t/C_0)$  versus reaction time).

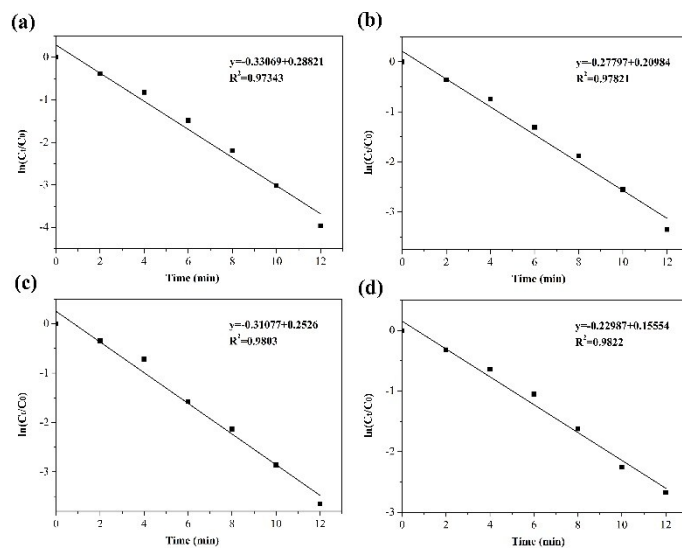

**Fig. S29** a b c d) Kinetic analysis of CEES oxidation for compounds 5-8 ( $\ln(C_t/C_0)$  versus reaction time).

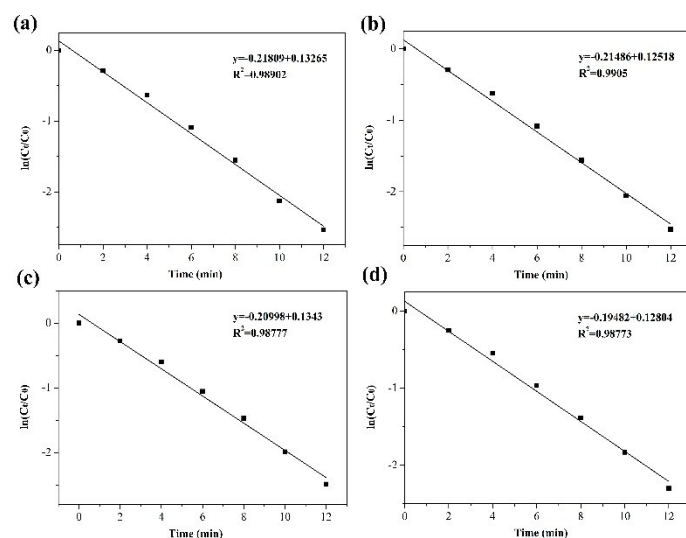

**Fig. S30** a b c d) Kinetic analysis of CEES oxidation for compounds **9-12** ( $\ln(C_t/C_0)$  versus reaction time).

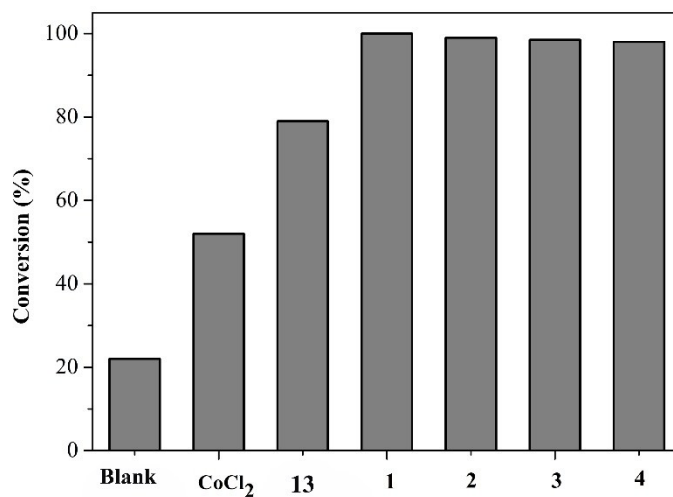

**Fig. S31** DECP decomposition by different catalysts. Reaction conditions:  $[\text{DECP}] = 1$  mmol,  $0.6 \mu\text{mol}$  catalyst,  $0.25 \text{ mmol}$  naphthalene (internal standard),  $600 \mu\text{L}$  DMF and  $50 \mu\text{L}$   $\text{H}_2\text{O}$  at room temperature for 10 min.

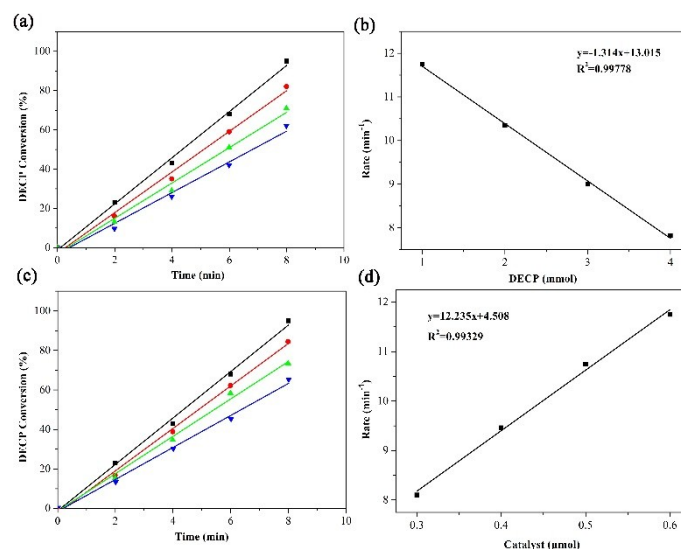

**Fig. S32** Kinetic analysis of DECP. a) The DECP conversion by **1**. Line A (black):  $n[\text{DECP}] = 1 \text{ mmol}$ ,  $y = 11.75x - 1.2$ ,  $R^2 = 0.99608$ ; Line B (red):  $n[\text{DECP}] = 2 \text{ mmol}$ ,  $y = 10.35x - 3$ ,  $R^2 = 0.99125$ ; Line C (green):  $n[\text{DECP}] = 3 \text{ mmol}$ ,  $y = 9x - 3.2$ ,  $R^2 = 0.98664$ ; Line D (blue):  $n[\text{DECP}] = 4 \text{ mmol}$ ,  $y = 7.82x - 3.36$ ,  $R^2 = 0.98255$ ; b) Plot of the initial rate versus DECP concentration in the decontamination of DECP using **1**; c) Line A (black): the mass of **1**:  $1 \mu\text{mol}$ ,  $y = 11.75x - 1.2$ ,  $R^2 = 0.99608$ ; Line B (red): the mass of **1**:  $0.75 \mu\text{mol}$ ,  $y = 10.745x - 2.32$ ,  $R^2 = 0.99604$ ; Line C (green): the mass of **1**:  $0.5 \mu\text{mol}$ ,  $y = 9.46x - 1.76$ ,  $R^2 = 0.99237$ ; Line D (blue): the mass of **1**:  $0.25 \mu\text{mol}$ ,  $y = 8.1x - 1.8$ ,  $R^2 = 0.99353$ ; d) Plot of the initial rate versus the amount of **1** in the decontamination of DECP.

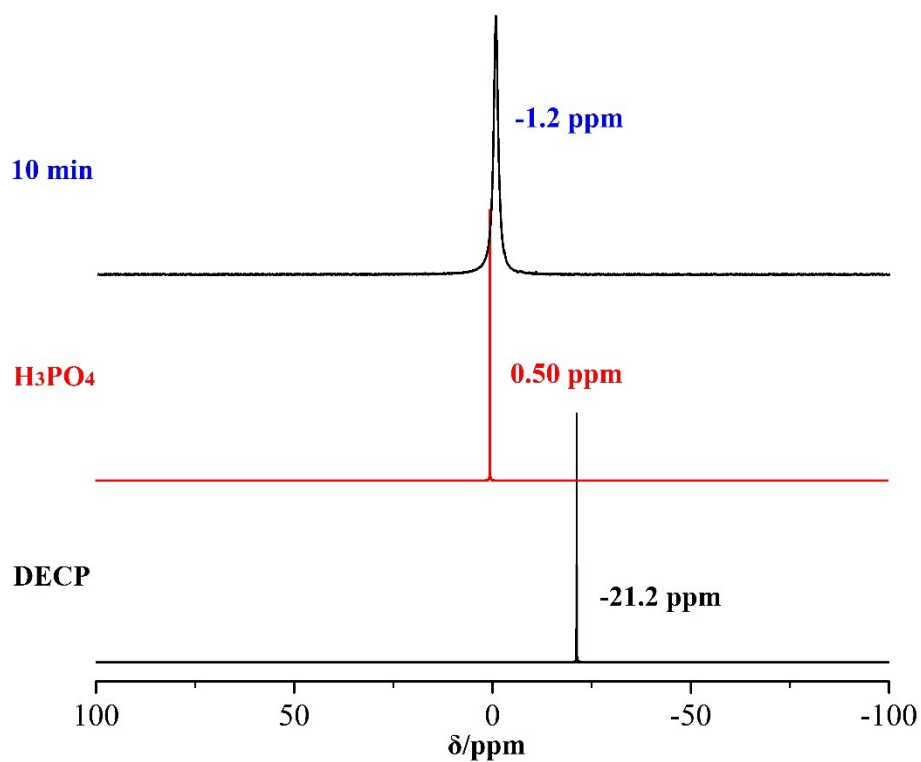

**Fig. S33** The  $^{31}\text{P}$  NMR spectra of pure DECP (black), phosphates (red) and the catalytic reaction after 10 min (blue). According to the chemical shift of these  $^{31}\text{P}$  NMR spectra, we can conclude that the final product for the hydrolysis of DECP is DEHP.



#### IV. Supplementary tables

**Table S1.** The formulas of compounds **1-12**.

| Compound  | Formula                                                                                                                                                                                                                                                             |
|-----------|---------------------------------------------------------------------------------------------------------------------------------------------------------------------------------------------------------------------------------------------------------------------|
| <b>1</b>  | $\text{K}_5\text{H}[\text{Co}(\text{H}_2\text{O})_3][\text{AsMo}_6\text{O}_{21}(\text{O}_2\text{C}(\text{C}_6\text{H}_4)\text{NH}_3)_2(\text{O}_2\text{C}(\text{C}_6\text{H}_4)\text{NH}_2)]_2 \cdot 17\text{H}_2\text{O}$                                          |
| <b>2</b>  | $\text{K}_5\text{H}[\text{Ni}(\text{H}_2\text{O})_4][\text{AsMo}_6\text{O}_{21}(\text{O}_2\text{C}(\text{C}_6\text{H}_4)\text{NH}_3)_2(\text{O}_2\text{C}(\text{C}_6\text{H}_4)\text{NH}_2)]_2 \cdot 17\text{H}_2\text{O}$                                          |
| <b>3</b>  | $\text{K}_5\text{H}[\text{Zn}(\text{H}_2\text{O})_3][\text{AsMo}_6\text{O}_{21}(\text{O}_2\text{C}(\text{C}_6\text{H}_4)\text{NH}_3)_2(\text{O}_2\text{C}(\text{C}_6\text{H}_4)\text{NH}_2)]_2 \cdot 17\text{H}_2\text{O}$                                          |
| <b>4</b>  | $\text{K}_5\text{H}[\text{Mn}(\text{H}_2\text{O})_4][\text{AsMo}_6\text{O}_{21}(\text{O}_2\text{C}(\text{C}_6\text{H}_4)\text{NH}_3)_2(\text{O}_2\text{C}(\text{C}_6\text{H}_4)\text{NH}_2)]_2 \cdot 18\text{H}_2\text{O}$                                          |
| <b>5</b>  | $\text{Cs}_4\text{Na}_2[\text{Co}(\text{H}_2\text{O})_3][\text{TeMo}_6\text{O}_{21}(\text{O}_2\text{C}(\text{C}_6\text{H}_4)\text{NH}_2)_2(\text{O}_2\text{C}(\text{C}_6\text{H}_4)\text{NH}_3)]_2 \cdot 21\text{H}_2\text{O}$                                      |
| <b>6</b>  | $\text{Cs}_4\text{K}_2[\text{Ni}(\text{H}_2\text{O})_3][\text{TeMo}_6\text{O}_{21}(\text{O}_2\text{C}(\text{C}_6\text{H}_4)\text{NH}_2)_2(\text{O}_2\text{C}(\text{C}_6\text{H}_4)\text{NH}_3)]_2 \cdot 13\text{H}_2\text{O}$                                       |
| <b>7</b>  | $\text{Cs}_4\text{KH}[\text{Zn}(\text{H}_2\text{O})_2][\text{TeMo}_6\text{O}_{21}(\text{O}_2\text{C}(\text{C}_6\text{H}_4)\text{NH}_2)_2(\text{O}_2\text{C}(\text{C}_6\text{H}_4)\text{NH}_3)]_2 \cdot 16\text{H}_2\text{O}$                                        |
| <b>8</b>  | $\text{Cs}_4\text{KH}[\text{Mn}(\text{H}_2\text{O})_3][\text{TeMo}_6\text{O}_{21}(\text{O}_2\text{C}(\text{C}_6\text{H}_4)\text{NH}_2)_2(\text{O}_2\text{C}(\text{C}_6\text{H}_4)\text{NH}_3)]_2 \cdot 19\text{H}_2\text{O}$                                        |
| <b>9</b>  | $\text{Rb}_2\text{H}_2[\text{Co}(\text{H}_2\text{O})_6][\text{Co}(\text{H}_2\text{O})_3][\text{As}^{\text{III}}\text{Mo}_6\text{O}_{21}(\text{O}_2\text{CCH}_2\text{CH}_2\text{NH}_3)_2(\text{O}_2\text{CCH}_3)]_2 \cdot 12\text{H}_2\text{O}$                      |
| <b>10</b> | $\text{Rb}_2\text{H}[\text{Na}_{0.5}\text{Ni}_{0.5}(\text{H}_2\text{O})_6]_2[\text{Ni}(\text{H}_2\text{O})_2][\text{As}^{\text{III}}\text{Mo}_6\text{O}_{21}(\text{O}_2\text{CCH}_2\text{CH}_2\text{NH}_3)_2(\text{O}_2\text{CCH}_3)]_2 \cdot 18\text{H}_2\text{O}$ |
| <b>11</b> | $\text{Rb}_2\text{H}_2[\text{Zn}(\text{H}_2\text{O})_6][\text{Zn}(\text{H}_2\text{O})_3][\text{As}^{\text{III}}\text{Mo}_6\text{O}_{21}(\text{O}_2\text{CCH}_2\text{CH}_2\text{NH}_3)_2(\text{O}_2\text{CCH}_3)]_2 \cdot 14\text{H}_2\text{O}$                      |
| <b>12</b> | $\text{K}_2\text{NaH}[\text{Mn}(\text{H}_2\text{O})_3]_2[\text{As}^{\text{III}}\text{Mo}_6\text{O}_{21}(\text{O}_2\text{CCH}_2\text{CH}_2\text{NH}_3)_2(\text{O}_2\text{CCH}_3)]_2 \cdot 12\text{H}_2\text{O}$                                                      |

**Table S2.** Oxidation of CEES under different solvents catalyzed by compound **1**.

| Entry | Catalyst loading (%) | oxidant                       | Time (min) | Solvent       | Conversion (%) | Selectivity (%) |
|-------|----------------------|-------------------------------|------------|---------------|----------------|-----------------|
| 1     | 1                    | H <sub>2</sub> O <sub>2</sub> | 12         | Acetonitrile  | 98.9           | 98.0            |
| 2     | 1                    | H <sub>2</sub> O <sub>2</sub> | 12         | Ethanol       | 97.8           | 98.1            |
| 3     | 1                    | H <sub>2</sub> O <sub>2</sub> | 12         | Methanol      | 98.6           | 98.0            |
| 4     | 1                    | H <sub>2</sub> O <sub>2</sub> | 12         | ethyl acetate | 64.0           | 82.4            |

**Table S3.** Effects of the amount of compound **1** on CEES degradation.

| Catalyst loading (%) | Conversion (%) | TOF (h <sup>-1</sup> ) |
|----------------------|----------------|------------------------|
| 0.8                  | 73.0           | 456                    |
| 1.0                  | 98.9           | 495                    |
| 1.2                  | 98.5           | 410                    |

**Table S4** Crystal data and structure refinement for **1–12**

| Complex                                  | <b>1</b>                                                                                                            | <b>2</b>                                                                                                            | <b>3</b>                                                                                                            | <b>4</b>                                                                                                            |
|------------------------------------------|---------------------------------------------------------------------------------------------------------------------|---------------------------------------------------------------------------------------------------------------------|---------------------------------------------------------------------------------------------------------------------|---------------------------------------------------------------------------------------------------------------------|
| formula                                  | C <sub>42</sub> H <sub>81</sub> N <sub>6</sub> O <sub>74</sub> Mo <sub>12</sub> K <sub>5</sub><br>CoAs <sub>2</sub> | C <sub>42</sub> H <sub>83</sub> N <sub>6</sub> O <sub>75</sub> Mo <sub>12</sub> K <sub>5</sub><br>NiAs <sub>2</sub> | C <sub>42</sub> H <sub>81</sub> N <sub>6</sub> O <sub>74</sub> Mo <sub>12</sub> K <sub>5</sub><br>ZnAs <sub>2</sub> | C <sub>42</sub> H <sub>85</sub> N <sub>6</sub> O <sub>76</sub> Mo <sub>12</sub> K <sub>5</sub><br>MnAs <sub>2</sub> |
| formula weight                           | 3409.68                                                                                                             | 3427.45                                                                                                             | 3416.14                                                                                                             | 3441.72                                                                                                             |
| T (K)                                    | 293(2)                                                                                                              | 293(2)                                                                                                              | 293(2)                                                                                                              | 293(2)                                                                                                              |
| crystal system                           | Triclinic                                                                                                           | Triclinic                                                                                                           | Triclinic                                                                                                           | Triclinic                                                                                                           |
| space group                              | <i>P</i> -1                                                                                                         | <i>P</i> -1                                                                                                         | <i>P</i> -1                                                                                                         | <i>P</i> -1                                                                                                         |
| a (Å)                                    | 11.6422(2)                                                                                                          | 11.6585(5)                                                                                                          | 11.6516(11)                                                                                                         | 11.6211(5)                                                                                                          |
| b (Å)                                    | 12.1336(2)                                                                                                          | 12.1103(5)                                                                                                          | 12.1230(12)                                                                                                         | 12.0930(5)                                                                                                          |
| c (Å)                                    | 17.7687(3)                                                                                                          | 17.7420(7)                                                                                                          | 17.7391(17)                                                                                                         | 17.7264(7)                                                                                                          |
| α (°)                                    | 76.6610(10)                                                                                                         | 76.859(2)                                                                                                           | 76.692(2)                                                                                                           | 76.5010(10)                                                                                                         |
| β (°)                                    | 89.6320(10)                                                                                                         | 89.702(3)                                                                                                           | 89.874(2)                                                                                                           | 89.8460(10)                                                                                                         |
| γ (°)                                    | 84.5510(10)                                                                                                         | 84.663(3)                                                                                                           | 84.635(2)                                                                                                           | 84.7250(10)                                                                                                         |
| U (Å <sup>3</sup> )                      | 2430.98(7)                                                                                                          | 2428.46(17)                                                                                                         | 2427.2(4)                                                                                                           | 2411.63(17)                                                                                                         |
| Z                                        | 1                                                                                                                   | 1                                                                                                                   | 1                                                                                                                   | 1                                                                                                                   |
| μ (mm <sup>-1</sup> )                    | 2.354                                                                                                               | 2.322                                                                                                               | 2.304                                                                                                               | 2.648                                                                                                               |
| reflections<br>collected                 | 8509                                                                                                                | 11143                                                                                                               | 8492                                                                                                                | 8369                                                                                                                |
| independent<br>reflections               | 6877                                                                                                                | 8568                                                                                                                | 6228                                                                                                                | 7421                                                                                                                |
| R(int)                                   | 0.0280                                                                                                              | 0.0387                                                                                                              | 0.0343                                                                                                              | 0.0201                                                                                                              |
| GOF on F <sup>2</sup>                    | 1.044                                                                                                               | 1.025                                                                                                               | 1.057                                                                                                               | 0.0958                                                                                                              |
| R <sub>1</sub> <sup>a</sup> [I > 2σ(I)]  | 0.0372                                                                                                              | 0.0413                                                                                                              | 0.0471                                                                                                              | 0.0288                                                                                                              |
| wR <sub>2</sub> <sup>b</sup> [I > 2σ(I)] | 0.0919                                                                                                              | 0.1061                                                                                                              | 0.1148                                                                                                              | 0.0736                                                                                                              |
| R <sub>1</sub> (all data)                | 0.0495                                                                                                              | 0.0583                                                                                                              | 0.0699                                                                                                              | 0.0336                                                                                                              |
| wR <sub>2</sub> (all data)               | 0.1007                                                                                                              | 0.1149                                                                                                              | 0.1309                                                                                                              | 0.0765                                                                                                              |

| Complex                                  | <b>5</b>                                                                                                                          | <b>6</b>                                                                                                                         | <b>7</b>                                                                                                           | <b>8</b>                                                                                                           |
|------------------------------------------|-----------------------------------------------------------------------------------------------------------------------------------|----------------------------------------------------------------------------------------------------------------------------------|--------------------------------------------------------------------------------------------------------------------|--------------------------------------------------------------------------------------------------------------------|
| formula                                  | C <sub>42</sub> H <sub>86</sub> N <sub>6</sub> O <sub>78</sub> Mo <sub>12</sub> Cs <sub>4</sub> CoNa <sub>2</sub> Te <sub>2</sub> | C <sub>42</sub> H <sub>70</sub> N <sub>6</sub> O <sub>70</sub> Mo <sub>12</sub> Cs <sub>4</sub> NiK <sub>2</sub> Te <sub>2</sub> | C <sub>42</sub> H <sub>75</sub> N <sub>6</sub> O <sub>72</sub> Mo <sub>12</sub> Cs <sub>4</sub> ZnKTe <sub>2</sub> | C <sub>42</sub> H <sub>83</sub> N <sub>6</sub> O <sub>76</sub> Mo <sub>12</sub> Cs <sub>4</sub> MnKTe <sub>2</sub> |
| formula weight                           | 3966.20                                                                                                                           | 3854.07                                                                                                                          | 3858.69                                                                                                            | 3920.30                                                                                                            |
| T (K)                                    | 220(2)                                                                                                                            | 220(2)                                                                                                                           | 220(2)                                                                                                             | 220(2)                                                                                                             |
| crystal system                           | Triclinic                                                                                                                         | Triclinic                                                                                                                        | Triclinic                                                                                                          | Triclinic                                                                                                          |
| space group                              | <i>P</i> -1                                                                                                                       | <i>P</i> -1                                                                                                                      | <i>P</i> -1                                                                                                        | <i>P</i> -1                                                                                                        |
| a (Å)                                    | 11.7267(12)                                                                                                                       | 11.686(9)                                                                                                                        | 11.6855(4)                                                                                                         | 11.651(3)                                                                                                          |
| b (Å)                                    | 12.4654(13)                                                                                                                       | 12.336(10)                                                                                                                       | 12.3860(6)                                                                                                         | 12.303(4)                                                                                                          |
| c (Å)                                    | 18.6945(19)                                                                                                                       | 18.569(15)                                                                                                                       | 18.6191(8)                                                                                                         | 18.630(5)                                                                                                          |
| α (°)                                    | 74.384(4)                                                                                                                         | 75.760(14)                                                                                                                       | 74.699(3)                                                                                                          | 74.094(12)                                                                                                         |
| β (°)                                    | 85.990(4)                                                                                                                         | 86.017(13)                                                                                                                       | 85.651(3)                                                                                                          | 85.386(13)                                                                                                         |
| γ (°)                                    | 84.238(4)                                                                                                                         | 84.106(12)                                                                                                                       | 83.954(3)                                                                                                          | 84.132(12)                                                                                                         |
| U (Å <sup>3</sup> )                      | 2615.9(5)                                                                                                                         | 2578(4)                                                                                                                          | 2581.64(19)                                                                                                        | 2551.0(13)                                                                                                         |
| Z                                        | 1                                                                                                                                 | 1                                                                                                                                | 1                                                                                                                  | 1                                                                                                                  |
| μ (mm <sup>-1</sup> )                    | 2.518                                                                                                                             | 2.482                                                                                                                            | 2.482                                                                                                              | 2.552                                                                                                              |
| reflections collected                    | 9176                                                                                                                              | 8220                                                                                                                             | 8686                                                                                                               | 8217                                                                                                               |
| independent reflections                  | 8301                                                                                                                              | 6971                                                                                                                             | 7206                                                                                                               | 7259                                                                                                               |
| R(int)                                   | 0.0325                                                                                                                            | 0.0463                                                                                                                           | 0.0476                                                                                                             | 0.0556                                                                                                             |
| GOF on F <sup>2</sup>                    | 1.021                                                                                                                             | 1.030                                                                                                                            | 1.046                                                                                                              | 1.048                                                                                                              |
| R <sub>1</sub> <sup>a</sup> [I > 2σ(I)]  | 0.0375                                                                                                                            | 0.0594                                                                                                                           | 0.0508                                                                                                             | 0.0504                                                                                                             |
| wR <sub>2</sub> <sup>b</sup> [I > 2σ(I)] | 0.0956                                                                                                                            | 0.1661                                                                                                                           | 0.1340                                                                                                             | 0.1403                                                                                                             |
| R <sub>1</sub> (all data)                | 0.0418                                                                                                                            | 0.0687                                                                                                                           | 0.0619                                                                                                             | 0.0556                                                                                                             |
| wR <sub>2</sub> (all data)               | 0.0982                                                                                                                            | 0.1758                                                                                                                           | 0.1420                                                                                                             | 0.1452                                                                                                             |

| Complex                                  | <b>9</b>                                                                                                               | <b>10</b>                                                                                                                | <b>11</b>                                                                                                                           | <b>12</b>                                                                                                                           |
|------------------------------------------|------------------------------------------------------------------------------------------------------------------------|--------------------------------------------------------------------------------------------------------------------------|-------------------------------------------------------------------------------------------------------------------------------------|-------------------------------------------------------------------------------------------------------------------------------------|
| formula                                  | C <sub>16</sub> H <sub>78</sub> N <sub>4</sub> O <sub>75</sub> Mo <sub>12</sub> Rb<br>2Co <sub>2</sub> As <sub>2</sub> | C <sub>16</sub> H <sub>99</sub> N <sub>4</sub> O <sub>86</sub> Mo <sub>12</sub> Rb<br>2Ni <sub>2</sub> NaAs <sub>2</sub> | C <sub>16</sub> H <sub>82</sub> N <sub>4</sub> O <sub>77</sub> Mo <sub>12</sub> R<br>b <sub>2</sub> Zn <sub>2</sub> As <sub>2</sub> | C <sub>16</sub> H <sub>71</sub> N <sub>4</sub> O <sub>72</sub> Mo <sub>12</sub> K <sub>2</sub><br>Mn <sub>2</sub> NaAs <sub>2</sub> |
| formula weight                           | 3116.74                                                                                                                | 3336.46                                                                                                                  | 3165.70                                                                                                                             | 2983.96                                                                                                                             |
| T (K)                                    | 293(2)                                                                                                                 | 293(2)                                                                                                                   | 293(2)                                                                                                                              | 293(2)                                                                                                                              |
| crystal system                           | Monoclinic                                                                                                             | Monoclinic                                                                                                               | Monoclinic                                                                                                                          | Monoclinic                                                                                                                          |
| space group                              | <i>P21/c</i>                                                                                                           | <i>P21/c</i>                                                                                                             | <i>P21/c</i>                                                                                                                        | <i>P21/c</i>                                                                                                                        |
| a (Å)                                    | 13.8787(3)                                                                                                             | 13.8420(4)                                                                                                               | 13.8717(9)                                                                                                                          | 13.702(2)                                                                                                                           |
| b (Å)                                    | 23.7424(5)                                                                                                             | 23.8125(8)                                                                                                               | 23.7484(13)                                                                                                                         | 23.542(3)                                                                                                                           |
| c (Å)                                    | 15.8044(3)                                                                                                             | 14.9785(6)                                                                                                               | 15.8204(9)                                                                                                                          | 15.546(2)                                                                                                                           |
| α (°)                                    | 90.00                                                                                                                  | 90.00                                                                                                                    | 90.00                                                                                                                               | 90.00                                                                                                                               |
| β (°)                                    | 120.0320(10)                                                                                                           | 113.996(2)                                                                                                               | 119.884(4)                                                                                                                          | 119.466(11)                                                                                                                         |
| γ (°)                                    | 90.00                                                                                                                  | 90.00                                                                                                                    | 90.00                                                                                                                               | 90.00                                                                                                                               |
| U (Å <sup>3</sup> )                      | 4508.60(16)                                                                                                            | 4510.4(3)                                                                                                                | 4518.8(5)                                                                                                                           | 4366.0(10)                                                                                                                          |
| Z                                        | 2                                                                                                                      | 2                                                                                                                        | 2                                                                                                                                   | 2                                                                                                                                   |
| μ (mm <sup>-1</sup> )                    | 2.362                                                                                                                  | 2.321                                                                                                                    | 2.287                                                                                                                               | 2.308                                                                                                                               |
| reflections<br>collected                 | 7949                                                                                                                   | 7942                                                                                                                     | 7942                                                                                                                                | 7675                                                                                                                                |
| independent<br>reflections               | 6957                                                                                                                   | 6246                                                                                                                     | 6803                                                                                                                                | 6761                                                                                                                                |
| R(int)                                   | 0.0326                                                                                                                 | 0.0430                                                                                                                   | 0.0312                                                                                                                              | 0.0394                                                                                                                              |
| GOF on F <sup>2</sup>                    | 1.137                                                                                                                  | 1.056                                                                                                                    | 1.189                                                                                                                               | 1.047                                                                                                                               |
| R <sub>1</sub> <sup>a</sup> [I > 2σ(I)]  | 0.0556                                                                                                                 | 0.0481                                                                                                                   | 0.0753                                                                                                                              | 0.0474                                                                                                                              |
| wR <sub>2</sub> <sup>b</sup> [I > 2σ(I)] | 0.1483                                                                                                                 | 0.0979                                                                                                                   | 0.1729                                                                                                                              | 0.1329                                                                                                                              |
| R <sub>1</sub> (all data)                | 0.0644                                                                                                                 | 0.0678                                                                                                                   | 0.0871                                                                                                                              | 0.0579                                                                                                                              |
| wR <sub>2</sub> (all data)               | 0.1483                                                                                                                 | 0.1056                                                                                                                   | 0.1779                                                                                                                              | 0.1412                                                                                                                              |

$${}^a R1 = \sum ||F_0| - |F_C|| / \sum |F_0|; \quad {}^b wR2 = \sum [w(F_0^2 - F_C^2)^2] / \sum [w(F_0^2)^2]^{1/2}$$

**Table S5.** Selected bond lengths (Å) and angles (°) for **1–12**.

| Compound 1        |           |                   |           |
|-------------------|-----------|-------------------|-----------|
| Mo(1)-O(11)       | 1.712(4)  | Mo(2)-O(1)        | 2.164(4)  |
| Mo(3)-O(17)       | 1.710(4)  | Mo(4)-O(19)       | 2.282(4)  |
| Mo(5)-O(23)       | 1.710(4)  | Mo(6)-O(25)       | 2.337(4)  |
| K(1)-O(16)        | 2.753(5)  | K(3)-O(3)         | 3.033(4)  |
| Co(1)-O(14)       | 2.000(5)  | Co(1)-O(16)       | 2.046(4)  |
| O(1)-As(1)-O(2)   | 95.78(18) | O(1)-As(1)-O(3)   | 96.67(18) |
| Compound 2        |           |                   |           |
| Mo(1)-O(8)        | 1.710(4)  | Mo(2)-O(23)       | 2.283(4)  |
| Mo(3)-O(14)       | 2.205(4)  | Mo(4)-O(5)        | 1.710(4)  |
| Mo(5)-O(10)       | 1.714(4)  | Mo(6)-O(14)       | 2.185(4)  |
| K(1)-O(10)        | 2.811(6)  | K(2)-O(13)        | 2.707(5)  |
| Ni(1)-O(6)        | 1.972(5)  | Ni(1)-O(17)       | 2.010(4)  |
| O(26)-As(1)-O(14) | 95.87(16) | O(26)-As(1)-O(4)  | 96.70(15) |
| Compound 3        |           |                   |           |
| Mo(1)-O(2)        | 1.722(6)  | Mo(2)-O(4)        | 1.693(6)  |
| Mo(3)-O(16)       | 1.891(6)  | Mo(4)-O(1)        | 2.322(6)  |
| Mo(5)-O(12)       | 1.705(6)  | Mo(6)-O(13)       | 2.296(6)  |
| K(1)-O(6)         | 2.710(4)  | K(1)-O(10)        | 2.786(4)  |
| Zn(1)-O(2)        | 1.997(6)  | Zn(1)-O(15)       | 2.035(6)  |
| O(17)-As(1)-O(10) | 96.2(2)   | O(18)-As(1)-O(17) | 96.6(2)   |
| Compound 4        |           |                   |           |
| Mo(1)-O(9)        | 1.714(3)  | Mo(2)-O(1)        | 1.710(3)  |
| Mo(3)-O(13)       | 2.298(3)  | Mo(4)-O(3)        | 1.912(3)  |
| Mo(5)-O(15)       | 2.277(3)  | Mo(6)-O(5)        | 1.712(3)  |
| K(1)-O(1)         | 2.688(4)  | K(1)-O(9)         | 2.866(4)  |
| Mn(1)-O(22)       | 2.087(4)  | Mn(1)-O(16)       | 2.027(4)  |
| O(24)-As(1)-O(10) | 95.95(13) | O(10)-As(1)-O(27) | 96.62(13) |

| Compound 5        |           |                   |           |
|-------------------|-----------|-------------------|-----------|
| Mo(1)-O(5)        | 1.711(5)  | Mo(2)-O(27)       | 2.284(5)  |
| Mo(3)-O(8)        | 1.709(5)  | Mo(4)-O(26)       | 2.262(5)  |
| Mo(5)-O(11)       | 1.714(5)  | Mo(6)-O(14)       | 2.245(4)  |
| Cs(1)-O(8)        | 3.194(5)  | Cs(2)-O(3)        | 3.056(5)  |
| Co(1)-O(13)       | 2.110(5)  | Co(1)-O(23)       | 2.133(6)  |
| O(2)-Te(1)-O(7)   | 94.04(18) | O(14)-Te(1)-O(2)  | 93.70(18) |
| Compound 6        |           |                   |           |
| Mo(1)-O(1)        | 1.709(9)  | Mo(2)-O(10)       | 2.302(8)  |
| Mo(3)-O(2)        | 1.746(9)  | Mo(4)-O(4)        | 2.305(7)  |
| Mo(5)-O(13)       | 1.726(8)  | Mo(6)-O(9)        | 2.279(8)  |
| Cs(2)-O(25)       | 3.111(8)  | Cs(1)-O(22)       | 3.687(9)  |
| Ni(1)-O(3)        | 2.043(10) | Ni(1)-O(1)        | 2.016(11) |
| O(11)-Te(1)-O(19) | 93.4(3)   | O(19)-Te(1)-O(18) | 94.1(3)   |
| Compound 7        |           |                   |           |
| Mo(1)-O(14)       | 1.708(7)  | Mo(2)-O(16)       | 2.282(7)  |
| Mo(3)-O(18)       | 1.921(6)  | Mo(4)-O(1)        | 1.710(6)  |
| Mo(5)-O(5)        | 1.916(6)  | Mo(6)-O(19)       | 1.721(7)  |
| Zn(1)-O(21)       | 2.083(7)  | Zn(1)-O(19)       | 2.112(8)  |
| O(8)-Te(1)-O(10)  | 94.4(3)   | O(23)-Te(1)-O(8)  | 93.8(3)   |
| Compound 8        |           |                   |           |
| Mo(1)-O(1)        | 1.710(6)  | Mo(2)-O(2)        | 2.268(7)  |
| Mo(3)-O(6)        | 1.714(7)  | Mo(4)-O(8)        | 2.229(6)  |
| Mo(5)-O(7)        | 1.928(6)  | Mo(6)-O(5)        | 2.244(6)  |
| Cs(2)-O(27)       | 3.113(6)  | Cs(2)-O(18)       | 3.268(6)  |
| Mn(1)-O(13)       | 2.134(7)  | Mn(1)-O(1)        | 2.181(7)  |
| O(15)-Te(1)-O(21) | 94.3(3)   | O(21)-Te(1)-O(8)  | 94.4(2)   |

| Compound <b>9</b>  |           |                   |           |
|--------------------|-----------|-------------------|-----------|
| Mo(1)-O(11)        | 1.940(6)  | Mo(2)-O(4)        | 1.718(6)  |
| Mo(3)-O(18)        | 1.715(7)  | Mo(4)-O(5)        | 1.703(8)  |
| Mo(5)-O(27)        | 2.303(7)  | Mo(6)-O(22)       | 1.706(8)  |
| Co(1)-O(18)        | 2.103(7)  | Co(1)-O(10)       | 2.201(9)  |
| O(13)-As(1)-O(14)  | 96.3(3)   | O(13)-As(1)-O(9)  | 96.6(3)   |
| Compound <b>10</b> |           |                   |           |
| Mo(1)-O(6)         | 1.713(6)  | Mo(2)-O(23)       | 1.720(6)  |
| Mo(3)-O(9)         | 2.325(5)  | Mo(4)-O(3)        | 1.711(5)  |
| Mo(5)-O(13)        | 2.288(8)  | Mo(6)-O(21)       | 1.706(7)  |
| Ni(1)-O(17)        | 2.180(6)  | Ni(1)-O(23)       | 2.268(7)  |
| O(20)-As(1)-O(25)  | 96.3(3)   | O(25)-As(1)-O(24) | 96.4(3)   |
| Compound <b>11</b> |           |                   |           |
| Mo(1)-O(3)         | 2.335(9)  | Mo(2)-O(7)        | 1.709(9)  |
| Mo(3)-O(15)        | 2.221(8)  | Mo(4)-O(27)       | 1.719(10) |
| Mo(5)-O(5)         | 1.707(10) | Mo(6)-O(13)       | 2.220(9)  |
| Zn(1)-O(4)         | 2.192(10) | Zn(2)-O(9)        | 2.230(12) |
| O(13)-As(1)-O(14)  | 96.1(4)   | O(14)-As(1)-O(15) | 96.3(4)   |
| Compound <b>12</b> |           |                   |           |
| Mo(1)-O(10)        | 1.888(4)  | Mo(2)-O(2)        | 2.177(4)  |
| Mo(3)-O(14)        | 2.294(4)  | Mo(4)-O(21)       | 1.720(4)  |
| Mo(5)-O(22)        | 1.703(5)  | Mo(6)-O(9)        | 1.683(5)  |
| Mn(1)-O(21)        | 2.133(4)  | Mn(1)-O(13)       | 2.173(5)  |
| O(7)-As(1)-O(5)    | 96.36(19) | O(5)-As(1)-O(2)   | 96.56(18) |



(1) (a) Sheldrick. G. M. *SHELXL 97, Program for Crystal Structure Refinement, University of Göttingen, Germany, 1997.* (b) Sheldrick. G. M. *SHELXL 97, Program for Crystal Structure Solution, University of Göttingen, Germany, 1997.*
